# Supplementary material for: DPH1 Gene Mutations Identify a Candidate SAM Pocket in Radical Enzyme Dph1•Dph2 for Diphthamide Synthesis on EF2
Source: MDPI journal article supplement (doi:10.3390/biom13111655), 2023-11-16
Supplement: s1 [file s1]

## Supplementary Materials

Communication

# ***DPH1* gene mutations identify a candidate SAM pocket in radical enzyme Dph1•Dph2 for diphthamide synthesis on EF2**

Koray Ütkür <sup>1</sup>, Sarina Schmidt <sup>1</sup>, Klaus Mayer <sup>2</sup>, Roland Klassen <sup>1</sup>, Ulrich Brinkmann <sup>2</sup> and Raffael Schaffrath <sup>2,\*</sup>

<sup>1</sup> Institut für Biologie, Fachgebiet Mikrobiologie, Universität Kassel, Kassel, Germany

<sup>2</sup> Roche Pharma Research and Early Development (pRED), Large Molecule Research, Roche Innovation Center Munich, Penzberg, Germany

\* Correspondence: schaffrath@uni-kassel.de

### 1. Supplementary Tables

**Table S1.** Yeast strains used and generated in this study.

| Strain | Genotype                                                      | Source      |
|--------|---------------------------------------------------------------|-------------|
| BY4741 | <i>MATa his3Δ1 leu2Δ0 met15Δ0 ura3Δ0</i>                      | Euroscarf * |
| Y02262 | BY4741 but <i>dph1Δ::kanMX4</i>                               | Euroscarf   |
| KU18   | BY4741 but <i>DPH1-(HA)<sub>6</sub>::HIS3MX6</i>              | This study  |
| KU129  | BY4741 but <i>dph1G238A; KILEU2</i>                           | This study  |
| KU328  | BY4741 but <i>dph1G238A-(HA)<sub>6</sub>::HIS3MX6; KILEU2</i> | This study  |
| KU285  | BY4741 but <i>dph1H261A; KILEU2</i>                           | [1]         |
| KU329  | BY4741 but <i>dph1H261A-(HA)<sub>6</sub>::HIS3MX6; KILEU2</i> | This study  |
| KU287  | BY4741 but <i>dph1Q321A; KILEU2</i>                           | This study  |
| KU330  | BY4741 but <i>dph1Q321A-(HA)<sub>6</sub>::HIS3MX6; KILEU2</i> | This study  |
| KU289  | BY4741 but <i>dph1V349A; KILEU2</i>                           | This study  |
| KU331  | BY4741 but <i>dph1V349A-(HA)<sub>6</sub>::HIS3MX6; KILEU2</i> | This study  |
| KU291  | BY4741 but <i>dph1R370A; KILEU2</i>                           | This study  |
| KU332  | BY4741 but <i>dph1R370A-(HA)<sub>6</sub>::HIS3MX6; KILEU2</i> | This study  |
| KU293  | BY4741 but <i>dph1D374A; KILEU2</i>                           | This study  |
| KU333  | BY4741 but <i>dph1D374A-(HA)<sub>6</sub>::HIS3MX6; KILEU2</i> | This study  |
| KU25   | BY4741 but <i>dph1C368S-(HA)<sub>6</sub>::HIS3MX6</i>         | This study  |
| KU123  | BY4741 but <i>dph1Q321A/V349A; ::loxP::</i>                   | This study  |

\* <http://www.euroscarf.de/index.php?name=News>

**Table S2.** Primers used for PCR-based gene engineering and genomic verification.

| Name          | Sequence (5' → 3')                                                        | Usage * |
|---------------|---------------------------------------------------------------------------|---------|
| DPH1KOURAF    | CTCATGAACTATCTGCTGCGAATTTTAAGGATAATCGGATA<br>GCCAGCTGAAGCTTCGTACGC        | ko      |
| DPH13'UTRLEUF | CGTTTTTGACGGCTTGCAGGCGAACTAAATTGTCTAAAAT<br>TCAAAACCAGCTGAAGCTTCGTACG     | smi     |
| DPH13'UTRLEUR | GAATAAAAATAGGCTTGACCAGCAGTGATATCAAGTTAGA<br>AGGCATTGCATAGGCCACTAGTGGATCTG | ko/smi  |
| DPH15'UTRF    | GTGATGGTAGATTATAGCAAG                                                     | ko-ver  |
| DPH13'UTRR    | GGAAATATGCTTGGCAAACCTC                                                    | ko-ver  |
| DPH1G238AFW   | GGGGTGAAGTATTGGCGTGTACTTCTG                                               | sdm     |
| DPH1G238ARV   | CTTTCAGAAGTACACGCCAATACTTCAC                                              | sdm     |
| DPH1H261AFW   | CGGTGATGGTAGATTTGCTTTGGAGTC                                               | sdm     |
| DPH1H261ARV   | TATCATTGCAGACTCCAAAGCAAATCTACC                                            | sdm     |
| DPH1Q321AFW   | GGTGCATTAGGTAGAGCAGGTAATTTAAAC                                            | sdm     |
| DPH1Q321ARV   | CAGTGTTTAAATTACCTGCTCTACCTAATG                                            | sdm     |
| DPH1V349AFW   | GAAAATTATTCTAAGTGAAGCTTTTCCCC                                             | sdm     |
| DPH1V349ARV   | GCTTTTGGGGAAAAGCTTCACTTAG                                                 | sdm     |
| DPH1R370AFW   | CAGGTCGCATGTCCTGCACTGTCCATC                                               | sdm     |
| DPH1R370ARV   | CCCAATCGATGGACAGCGTAGGACATGC                                              | sdm     |
| DPH1D374AFW   | CCTAGACTGTCCATCGCTTGGGGTTATG                                              | sdm     |
| DPH1D374ARV   | GAAGGCATAACCCCAAGCGATGGACAG                                               | sdm     |
| DPH1C368SFW   | CAAATTGATGTTTTTGTTCAGGTCGCATCTCCTAGACTGTCC                                | sdm     |
| DPH1C368SRV   | GAAGGCATAACCCCAATCGATGGACAGTCTAGGAGATGCG<br>ACCTG                         | sdm     |
| DPH1S2        | CATATGTAACAGGAAGACAAGTGACAACAAAACTATTTA<br>AACTAATCGATGAATTCGAGCTCG       | tag     |
| DPH1S3        | CGAAGCTAAAGGATACGGGCGTGGGGAACTCCGAAACA<br>TGCGATTGAACGTACGCTGCAGGTCGAC    | tag     |

\* Abbreviations used: (i) ko – gene knock-out

(ii) smi – selection marker insertion

(iii) ko-ver – verification of gene knockout

(iv) sdm – site-directed mutagenesis

(v) tag – epitope tagging

3

**Figure S1.** Alignment between archaeal *CmnDph2* and eukaryal Dph1 and Dph2 sequences. Amino acid sequences of *CmnDph2* were aligned to sequences of Dph1 and Dph2 from *S. cerevisiae*, *A. thaliana*, *D. melanogaster*, *M. musculus* and *H. sapiens*. Eukaryal Dph1 residues conserved (dark green) to the SAM pocket residues (G158, H180, Q237, V265, R285 and D289) of *CmnDph2* (red) are shown boxed. The SAM pocket residue in position 290 from *CmnDph2* (D290) is less conserved and occupied in any of the eukaryal Dph1 query sequences with a conserved tryptophan residue. Note that eukaryal Dph2 sequences (light green and boxed) are not that conserved at the sites invariant between Dph1 or *CmnDph2* - except for counterpart analogues to *CmnV265* and *CmnD290* in Dph2 from *A. thaliana* (D332) and *D. melanogaster* (I309, D335) (see Fig. S2 in bold light green).

**Figure S2**

| <i>CmnDph2</i> | G158        | H180        | Q237        | V265        | R285        | D289        | D290        |
|----------------|-------------|-------------|-------------|-------------|-------------|-------------|-------------|
| <i>ScDph1</i>  | <b>G238</b> | <b>H261</b> | <b>Q321</b> | <b>V349</b> | <b>R370</b> | <b>D374</b> | W375        |
| <i>AtDph1</i>  | <b>G208</b> | <b>H234</b> | <b>Q294</b> | <b>L322</b> | <b>R344</b> | <b>D348</b> | W349        |
| <i>DmDph1</i>  | <b>G221</b> | <b>H243</b> | <b>Q303</b> | <b>I331</b> | <b>R352</b> | <b>D356</b> | W357        |
| <i>MmDph1</i>  | <b>G213</b> | <b>H235</b> | <b>Q295</b> | <b>I323</b> | <b>R344</b> | <b>D348</b> | W359        |
| <i>HsDph1</i>  | <b>G218</b> | <b>H240</b> | <b>Q300</b> | <b>I328</b> | <b>R349</b> | <b>D353</b> | W354        |
| <i>ScDph2</i>  | E228        | -           | R315        | P343        | Q364        | I368        | V369        |
| <i>AtDph2</i>  | S195        | -           | A288        | P316        | Q337        | L348        | <b>D342</b> |
| <i>DmDph2</i>  | S197        | -           | E281        | <b>I309</b> | F330        | Y334        | <b>D335</b> |
| <i>MmDph2</i>  | P193        | D231        | A294        | P322        | L343        | A347        | P348        |
| <i>HsDph2</i>  | P193        | D231        | A294        | P322        | L343        | A347        | P348        |

**Figure S2.** The SAM pocket from archaeal *CmnDph2* is conserved in eukaryal Dph1, not Dph2. Excerpt of the amino acid sequence alignment (see Fig. S1 above for full details) between eukaryal Dph1 and Dph2 from *S. cerevisiae*, *A. thaliana*, *D. melanogaster*, *M. musculus* and *H. sapiens* and *CmnDph2* (see Fig. S1 for full alignment). Dph1 residues conserved to *CmnDph2* (dark green) and a few scattered analogous Dph2 residues (light green) are highlighted in bold.



**Figure S3**

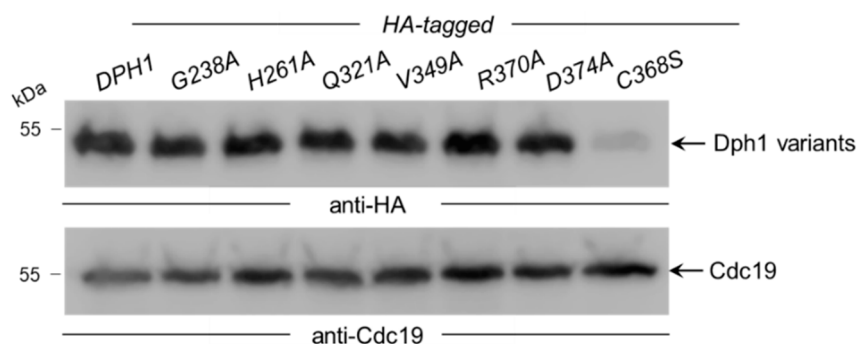

**Figure S3.** Dph1 protein expression analysis from wild-type and mutant strain backgrounds. Total extracts of yeast strains expressing HA-tagged Dph1 variants as indicated were subjected to Western blot analyses using *anti-HA* and *anti-Cdc19* antibodies to investigate cellular levels of Dph1, and pyruvate kinase Cdc19 as control. As a negative control, HA-tagged C388S mutant was included, which produces a highly labile catalytic Dph1 mutant protein.

**Figure S4**

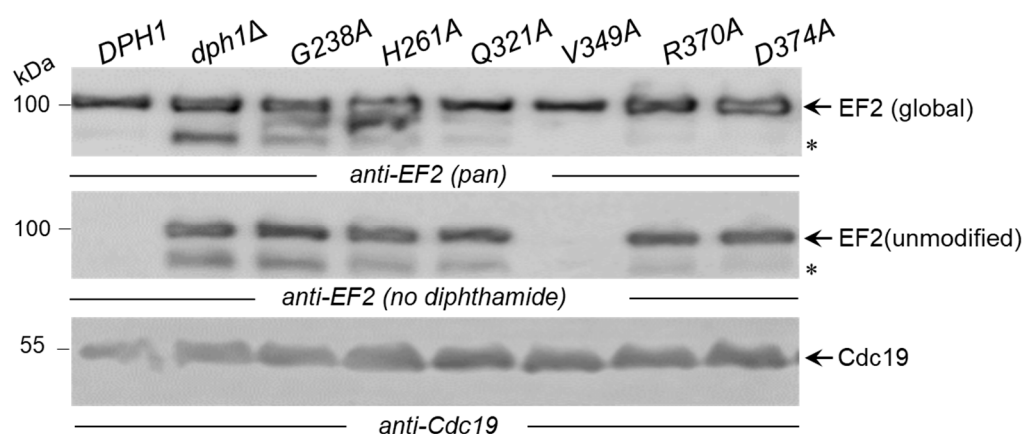

**Figure S4.** Detection of unmodified EF2 pools using Western blot analysis. Protein extracts of indicated yeast backgrounds were subjected to *anti-EF2(no diphthamide)* Western blots to recognize pools of EF2 not modified with diphthamide [2]. Detection of global EF2 amounts with *anti-EF2(pan)* or Cdc19 with *anti-Cdc19* antibodies is shown in parallel Western blots. EF2 degradation products are marked with an asterisk.

Figure S5

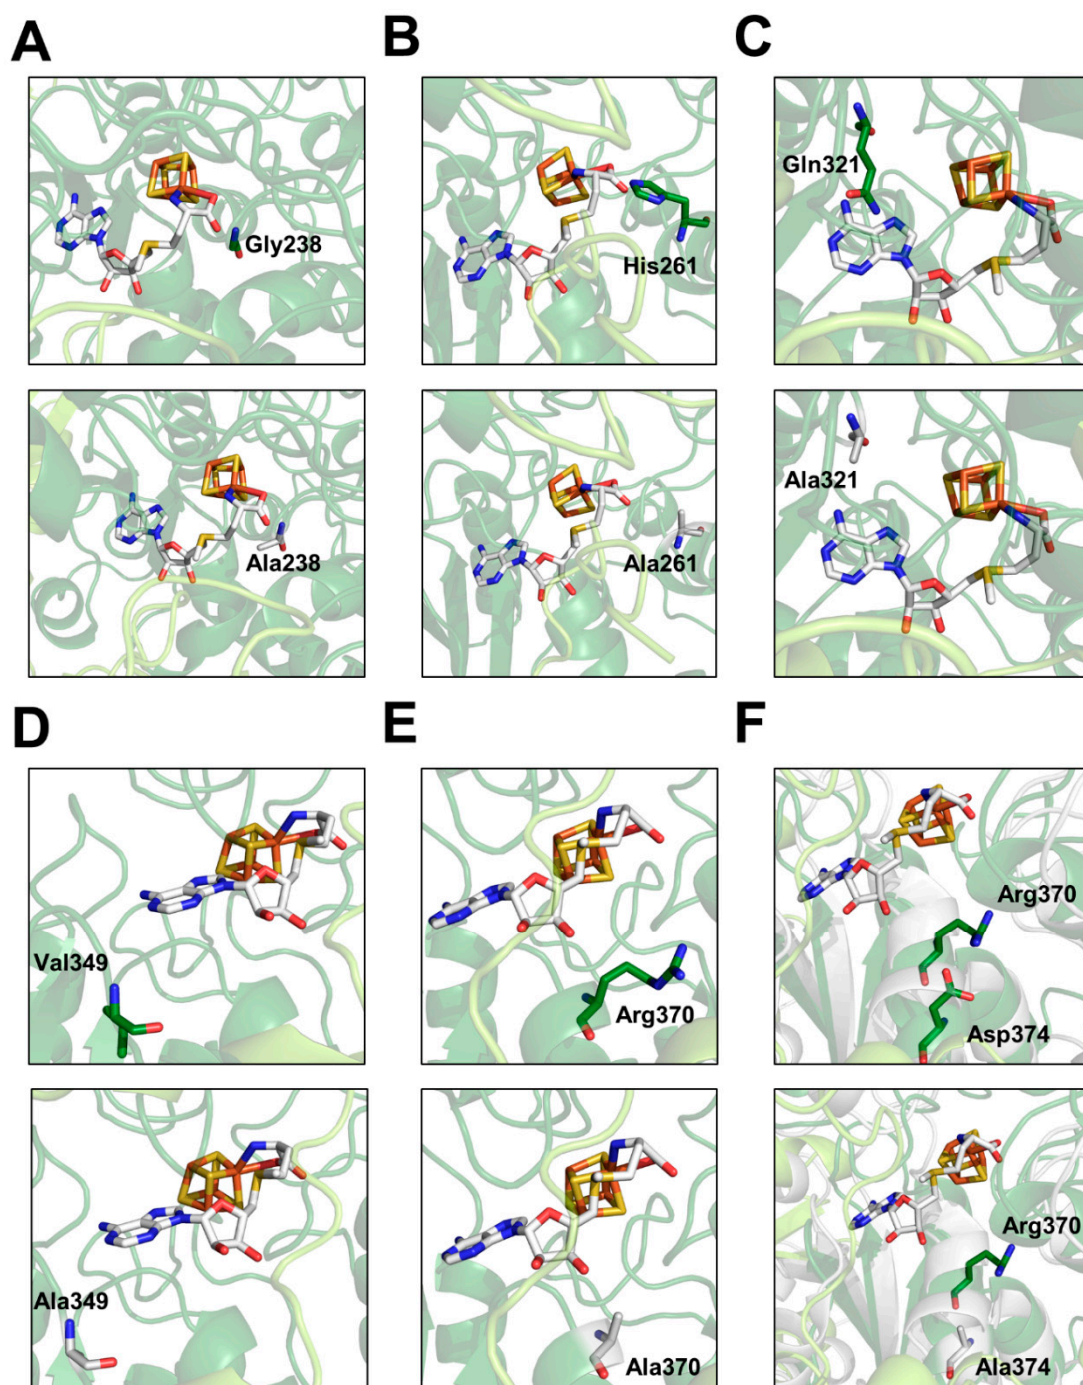

**Figure S5.** Structural consequences of alanine-mutations in the Dph1 SAM pocket. Alphafold/ColabFold-based [3,4] structural model of Dph1•Dph2 from *S. cerevisiae* was aligned to the structure of *Cmn*Dph2 in complex with SAM (PDB: 6BXN [5]). Protein structures of *Cmn*Dph2 were hidden and cartoon structures of *Sc*Dph1•Dph2 shown with 66% transparency to emphasize stick structures. Individual residues of the candidate SAM pocket (A-F, upper panels), respectively) were simulated upon alanine substitutions (A-F, lower panels) and illustrated using PyMOL version 1.3.

Figure S6

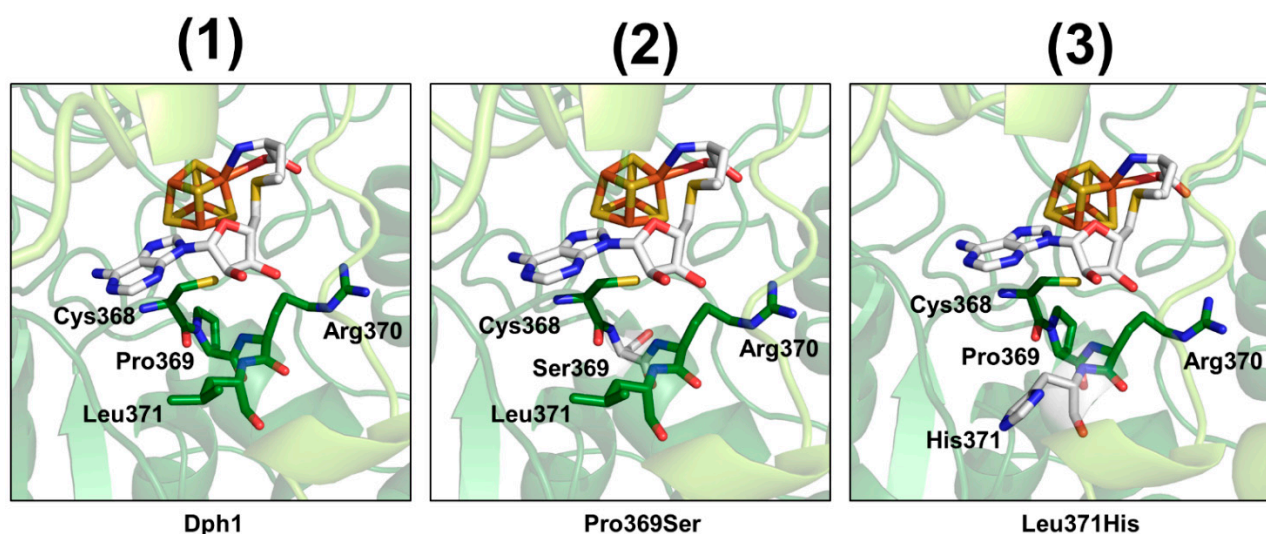

**Figure S6.** Structural consequences of DDS-related Dph1 mutations flanking the candidate SAM pocket. AlphaFold/ColabFold-based [3,4] structural model of Dph1•Dph2 from *S. cerevisiae* was aligned to the structure of CmnDph2 in complex with SAM (PDB:6BXN [5]). Protein structures of CmnDph2 were hidden and cartoon structures of ScDph1•Dph2 were given with 66% transparency to emphasize stick structures. DDS-related mutations P369S (2) and L371H (3) are illustrated compared to Dph1 wild-type (1) using PyMOL version 1.3.

Figure S7

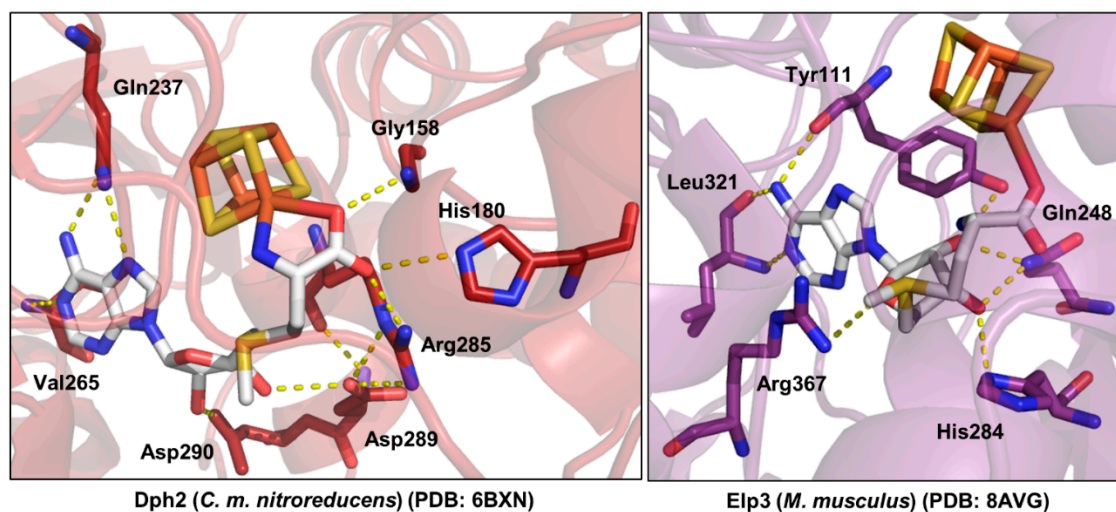

**Figure S7.** Structural comparison of SAM pockets between CmnDph2 and the canonical radical-SAM enzyme Elp3 from *Mus musculus*. Illustrations of SAM pockets within the structures of Dph2 from *Candidatus methanoperedens nitroreducens* (PDB:6BXN [5]) (left, firebrick red) and Elp3 from *Mus musculus* (PDB: 8AVG [6]) (right, violetpurple) show similarities and differences in comparison. Note that enzymes interact with the respective adenine moiety of SAM using a branched chain amino acid each (Dph2: Val265 and Elp3: Leu321). However, Elp3 occupies the SAM ribose moiety with four interaction partners (Arg367, His284, Gln248 and Tyr111), while Dph2 only pairs the ribose with Asp289 and Asp290 (the latter of which is not conserved in eukaryotes). In Elp3, the C<sub>2</sub> and C<sub>3</sub> OH-groups of the SAM ribose moiety are oriented towards the 4Fe-4S cluster, unlike in Dph2. The respective methionine moieties differ between enzymes as well regarding interaction partner counts and orientation. Structures were illustrated using PyMOL version 1.3.



## Original images

**Figure S8**

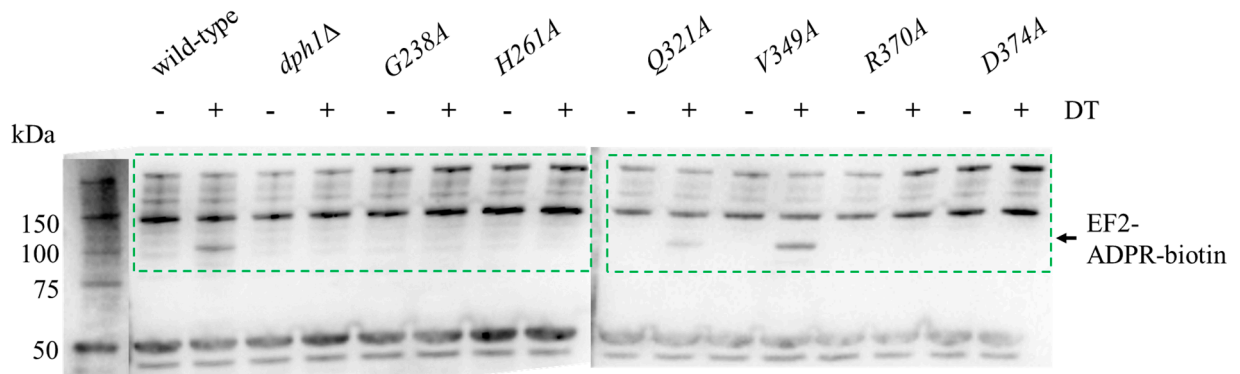

**Figure S8.** Original uncropped Western blot images underlying the data presented in Figure 3 of the main text (indicated by the areas of the green dotted boxes).

**Figure S9**

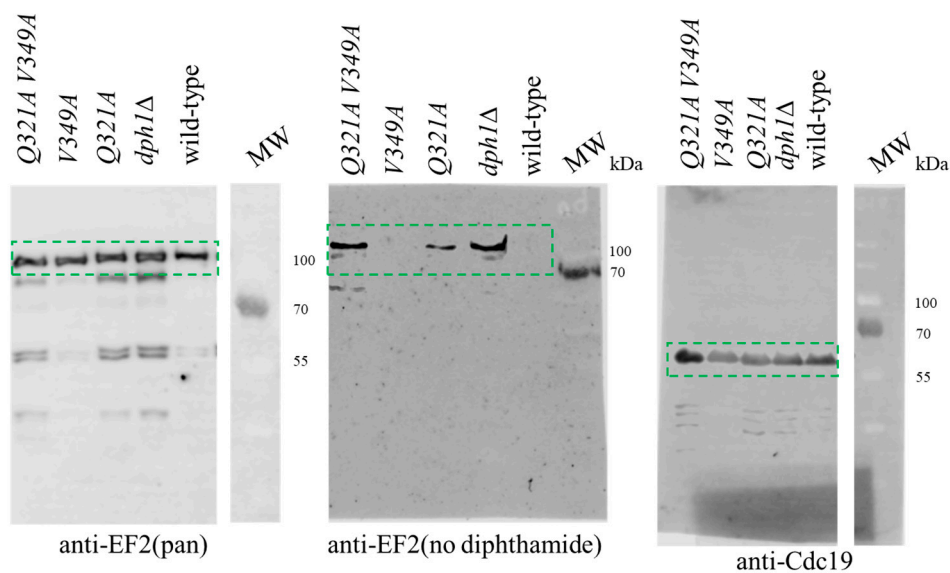

**Figure S9.** Original, uncropped Western blot images underlying the data presented in Figure 4B of the main text (indicated by the areas of the green dotted boxes).



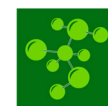

### 3. Supplementary References

1. Ütkür K, Mayer K, Khan M, Manivannan T, Schaffrath R, Brinkmann U. DPH1 and DPH2 variants that confer susceptibility to diphthamide deficiency syndrome in human cells and yeast models. *Dis. Model. Mech.* **2023**, 16, dmm050207, doi: 10.1242/dmm.050207.
2. Stahl S, da Silva Mateus Seidl AR, Ducret A, Kux van Geijtenbeek S, Michel S, Racek T, Birzele F, Haas AK, Rueger R, Gerg M, Niederfellner G, Pastan I, Brinkmann U. Loss of diphthamide pre-activates NF-kappaB and death receptor pathways and renders MCF7 cells hypersensitive to tumor necrosis factor. *Proc. Natl. Acad. Sci. USA* **2015**, 112, 10732–10737. doi: 10.1073/pnas.1512863112.
3. Jumper J, Evans R, Pritzel A, Green T, Figurnov M, Ronneberger O, Tunyasuvunakool K, Bates R, Žídek A, Potapenko A, Bridgland A, Meyer C, Kohl SAA, Ballard AJ, Cowie A, Romera-Paredes B, Nikolov S, Jain R, Adler J, Back T, Petersen S, Reiman D, Clancy E, Zielinski M, Steinegger M, Pacholska M, Berghammer T, Bodenstein S, Silver D, Vinyals O, Senior AW, Kavukcuoglu K, Kohli P, Hassabis D. Highly accurate protein structure prediction with AlphaFold. *Nature* **2021**, 596, 583–589. doi: 10.1038/s41586-021-03819-2.
4. Mirdita M, Schütze K, Moriwaki Y, Heo L, Ovchinnikov S, Steinegger M. ColabFold: making protein folding accessible to all. *Nat. Methods* **2022**, 19, 679–682. doi: 10.1038/s41592-022-01488-1.
5. Dong M, Kathiresan V, Fenwick MK, Torelli AT, Zhang Y, Caranto JD, Dzikovski B, Sharma A, Lancaster KM, Freed JH, Ealick SE, Hoffman BM, Lin H. Organometallic and radical intermediates reveal mechanism of diphthamide biosynthesis. *Science* **2018**, 359, 1247–1250. doi: 10.1126/science.aao6595.
6. Jaciuk M, Scherf D, Kaszuba K, Gaik M, Rau A, Kościelniak A, Krutyhołowa R, Rawski M, Indyka P, Graziadei A, Chramiec-Głąbik A, Biela A, Dobosz D, Lin TY, Abbassi NE, Hammermeister A, Rappsilber J, Kosinski J, Schaffrath R, Glatt S. Cryo-EM structure of the fully assembled Elongator complex. *Nucleic Acids Res.* **2023**, 51, 2011–2032. doi: 10.1093/nar/gkac1232.
